# Supplementary material for: Characterization of Epigallocatechin-Gallate-Grafted Chitosan Nanoparticles and Evaluation of Their Antibacterial and Antioxidant Potential
Source: MDPI journal article supplement (doi:10.3390/polym13091375), 2021-04-23
Supplement: s1 [file s1]

## Supplementary Material

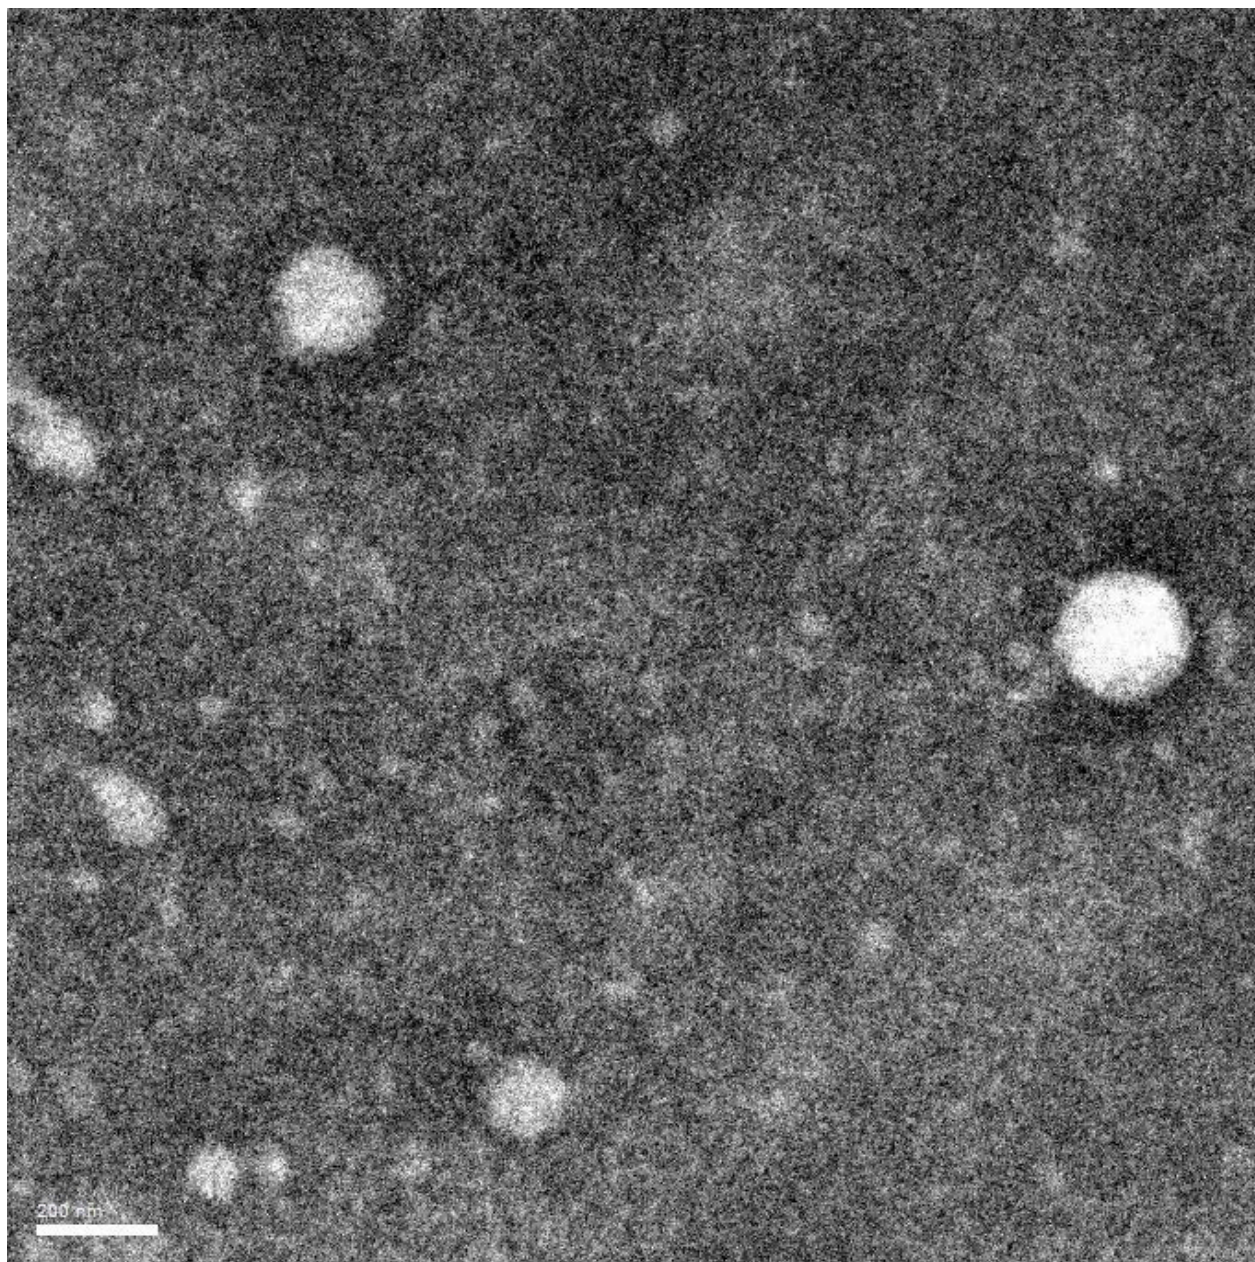

**Figure S1.** TEM images of Chitosan-P.

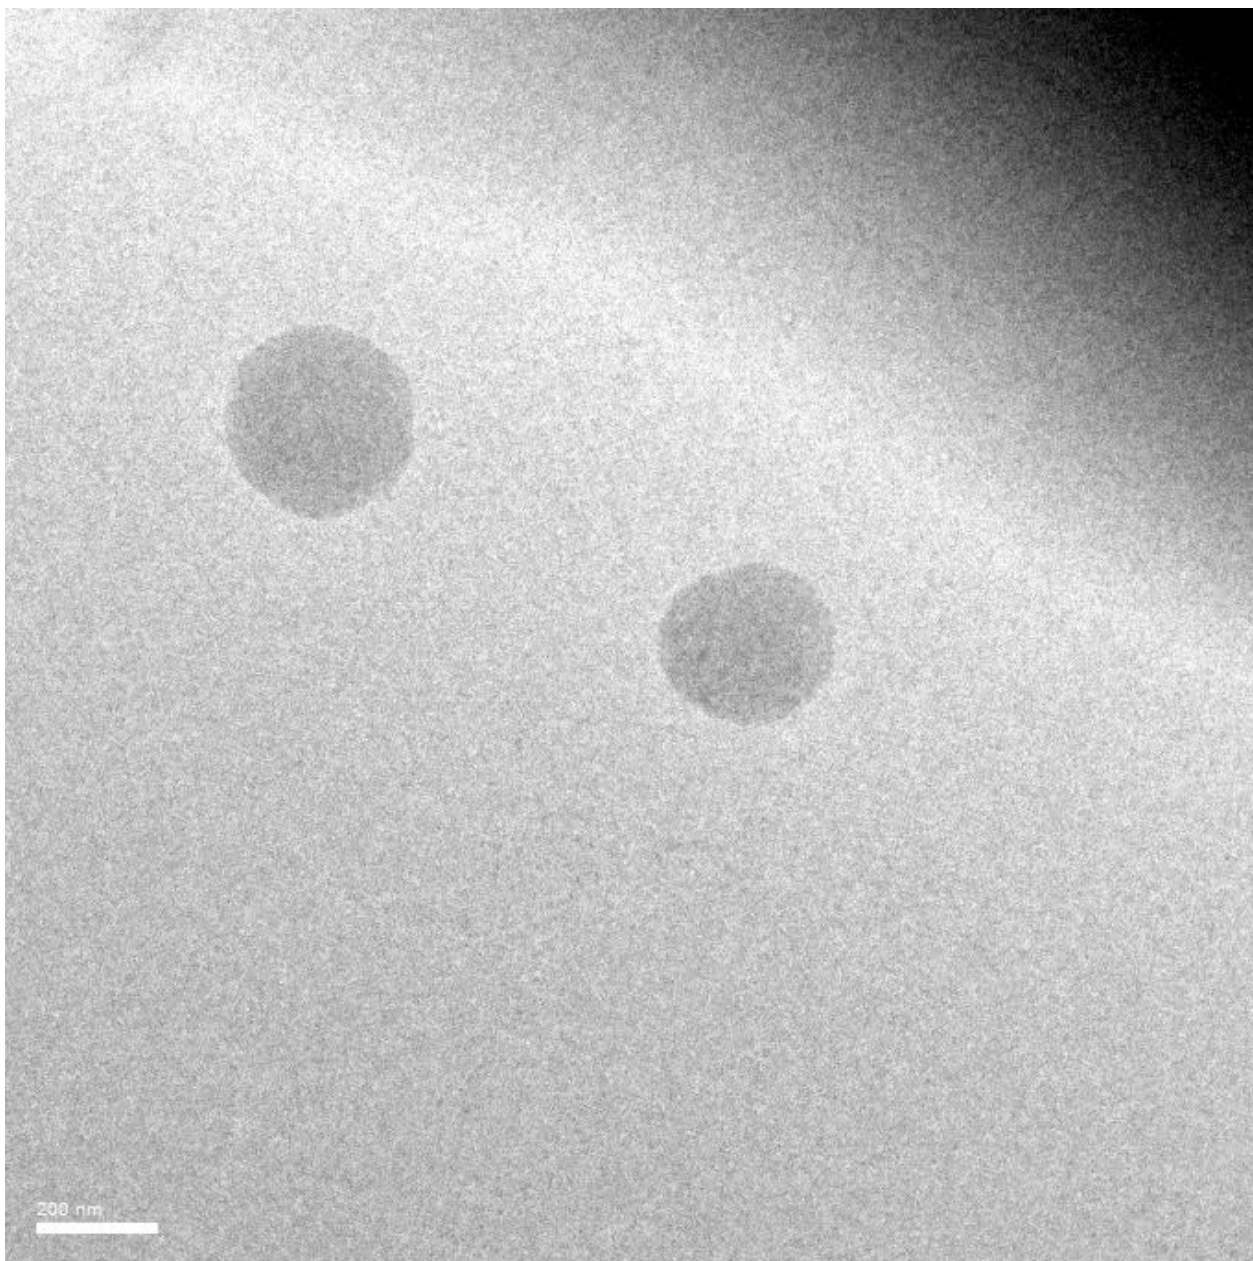

**Figure S2.** TEM image of EGCG-g-chitosan-P.

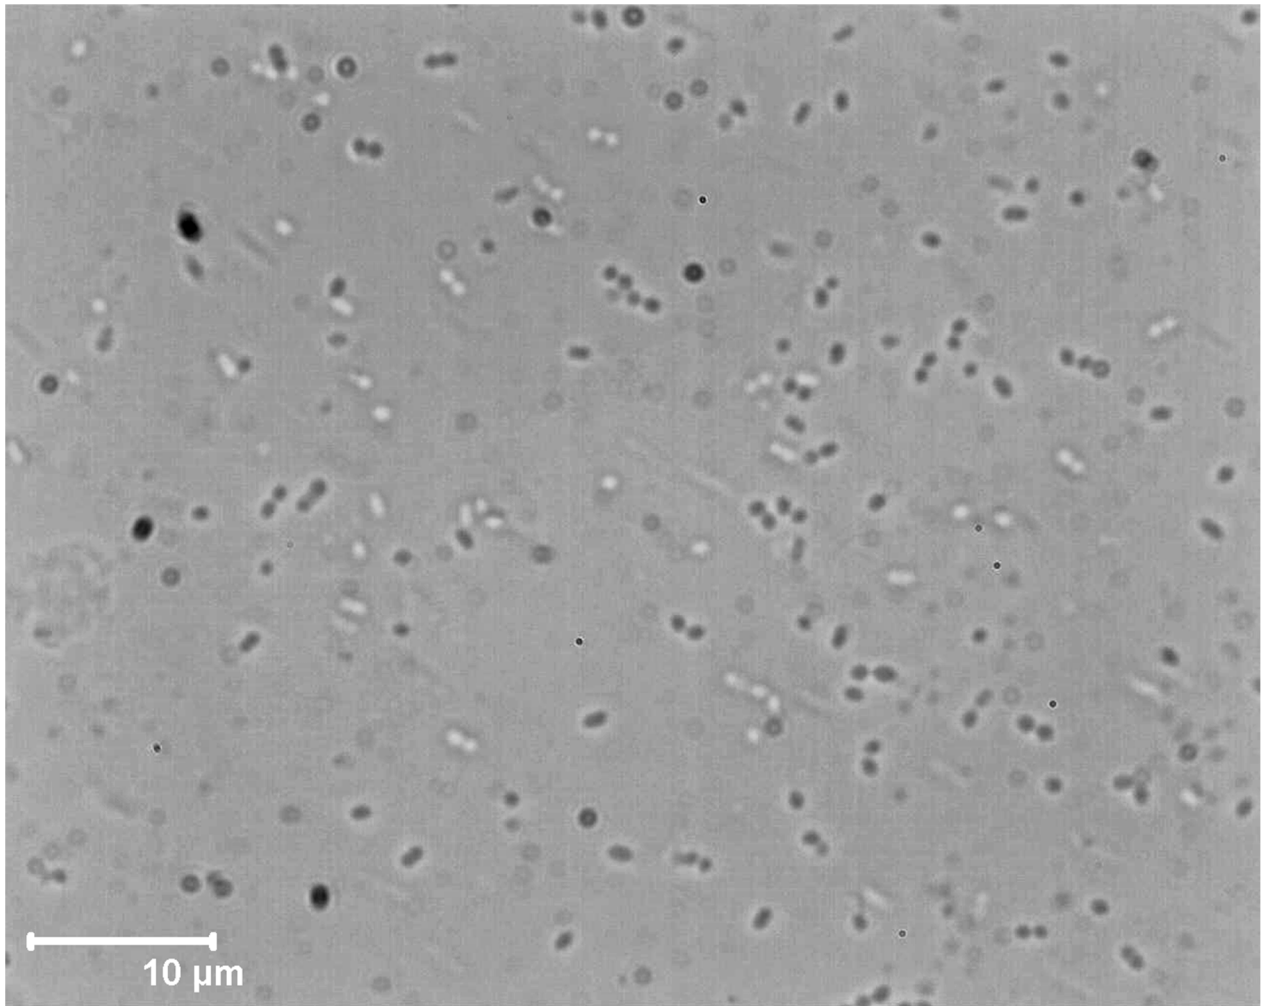

**Figure S3.** Morphology of *S. aureus* (control) (magnification =100x).



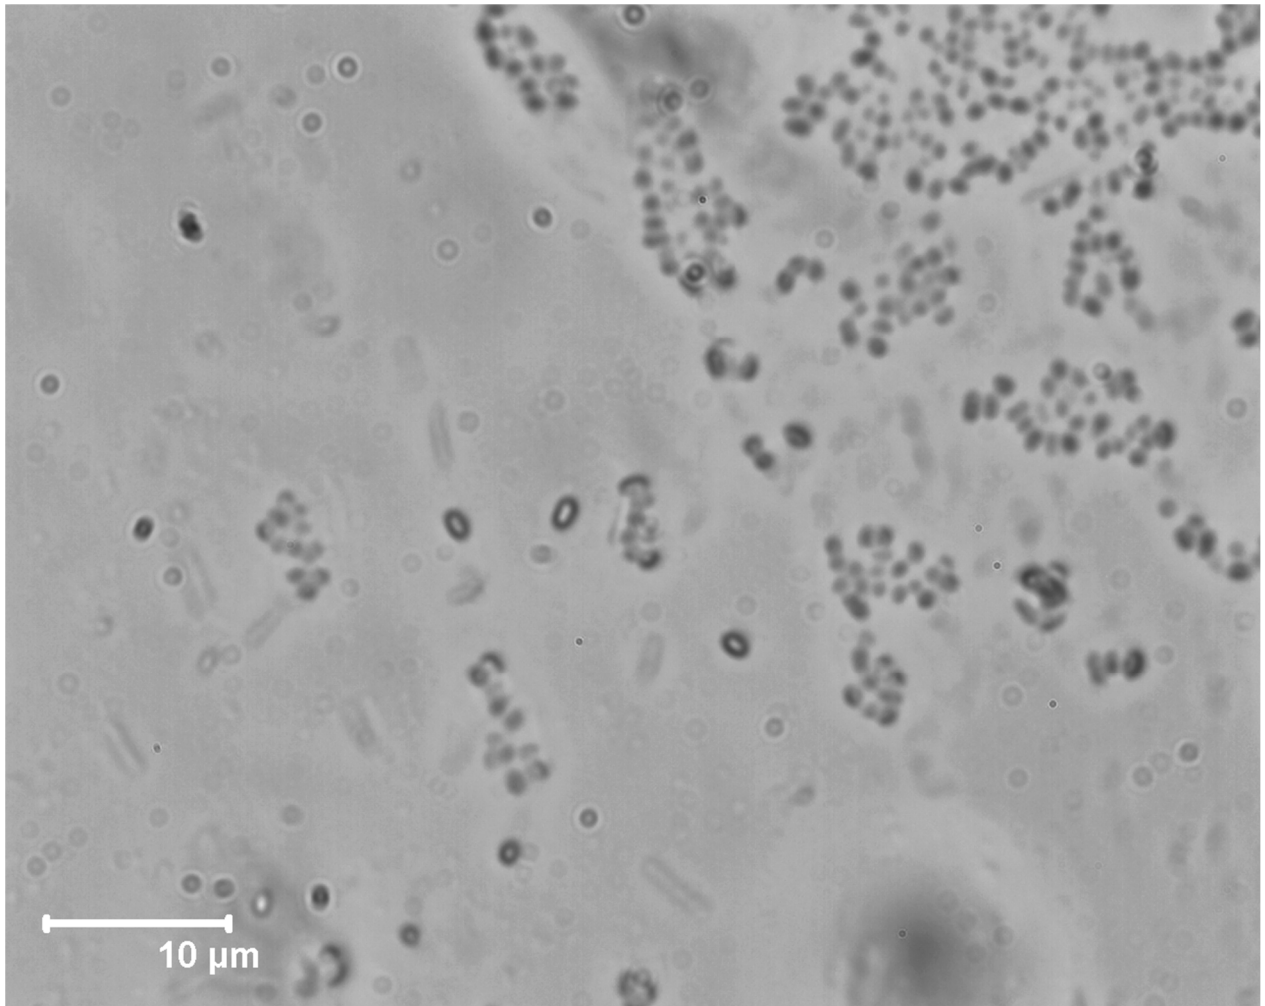

**Figure S4.** Effect of EGCG at 0.9 µg/mL on *S. aureus* bacterial morphology (magnification =100x).



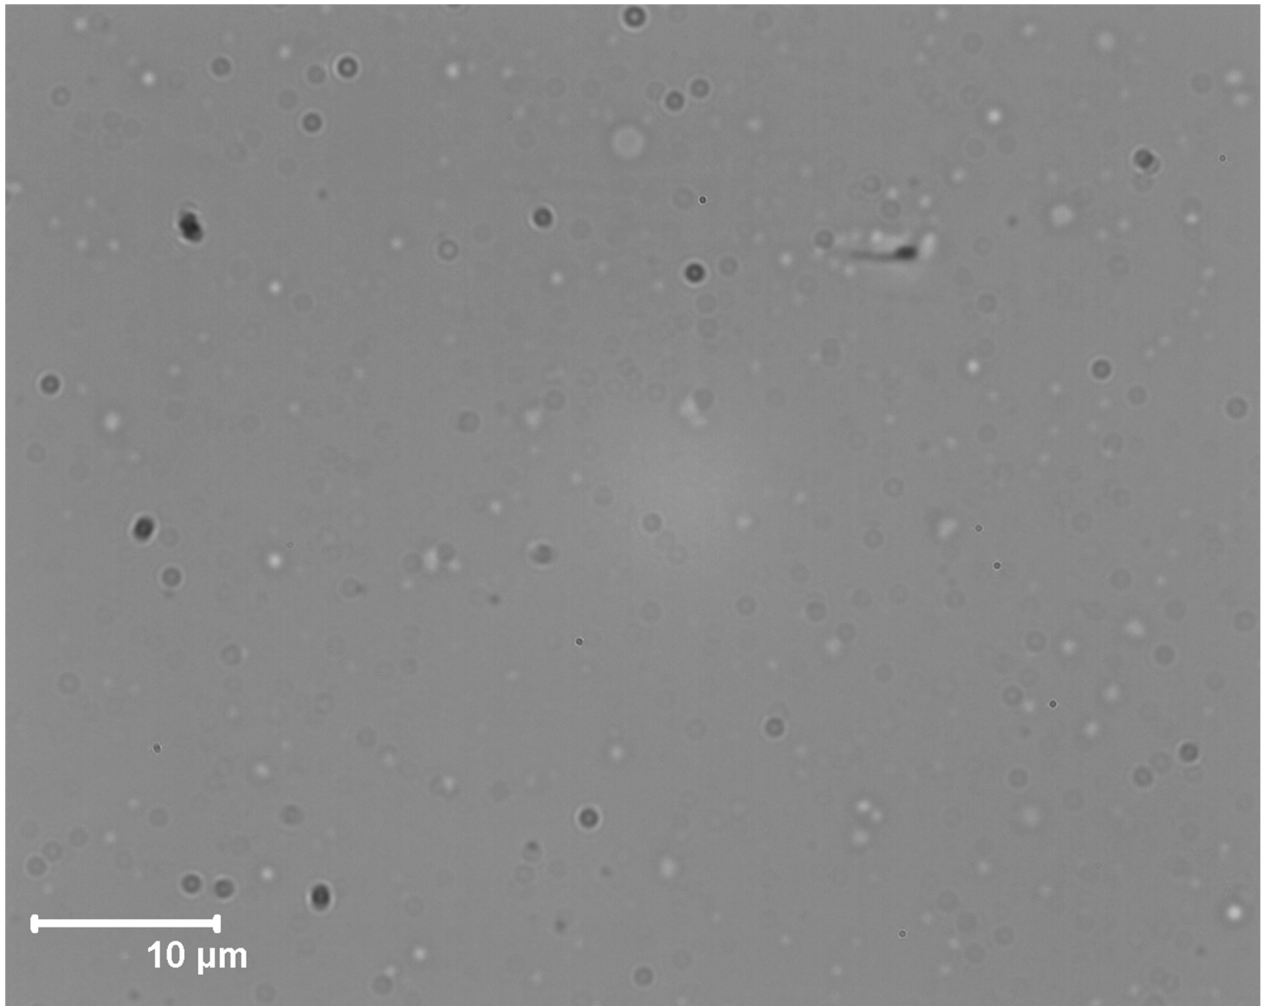

**Figure S5.** Effect of Chitosan-P at 0.9 µg/mL on *S. aureus* bacterial morphology (magnification =100x).

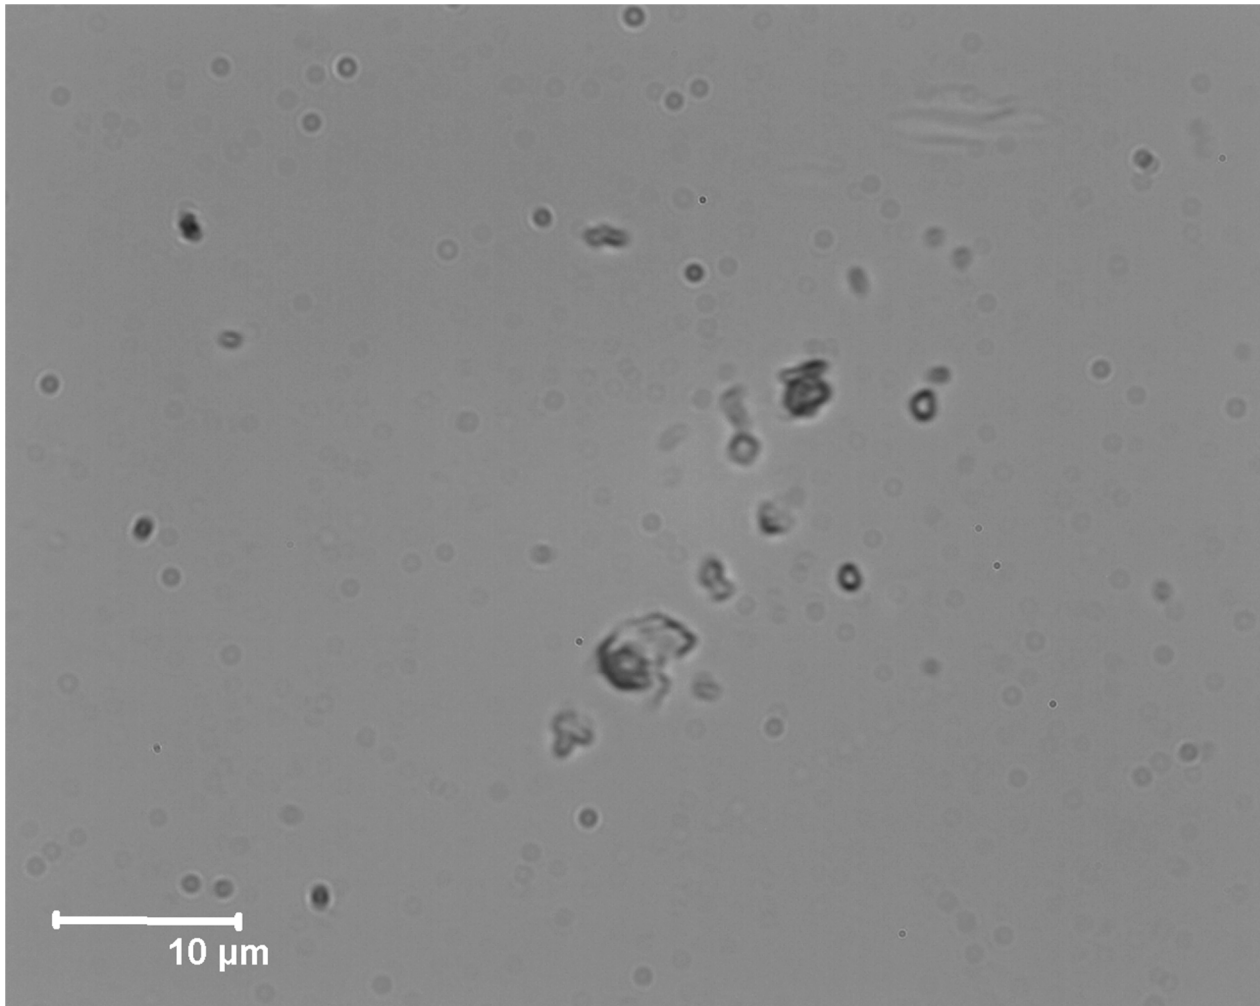

**Figure S6.** Effect of EGCG-g-chitosan-P at 0.9 μg/mL on *S. aureus* bacterial morphology (magnification =100x).

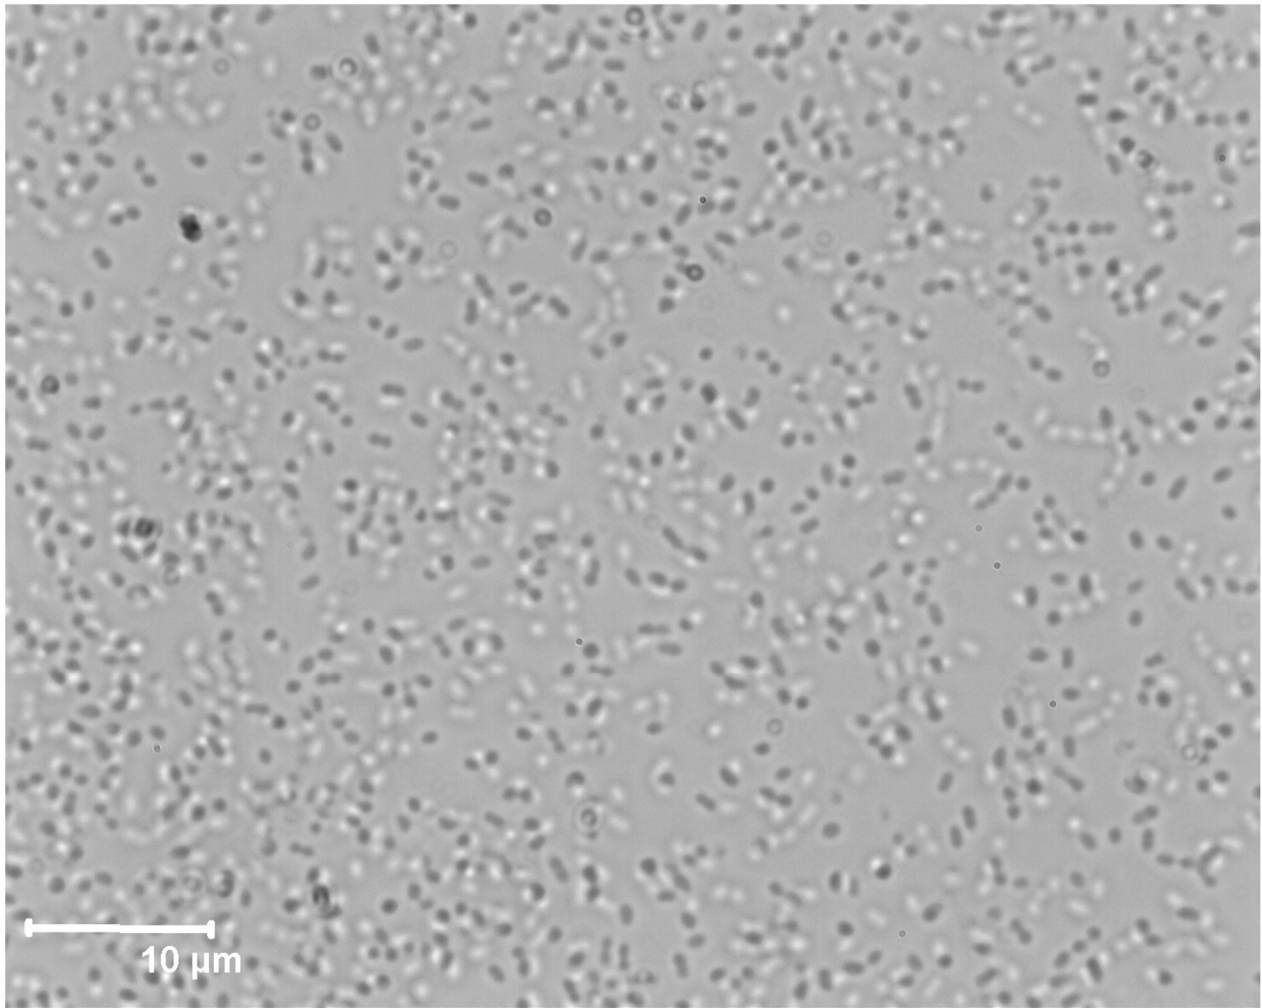

**Figure S7.** Morphology of *P. fluorescens* (control) (magnification =100x).



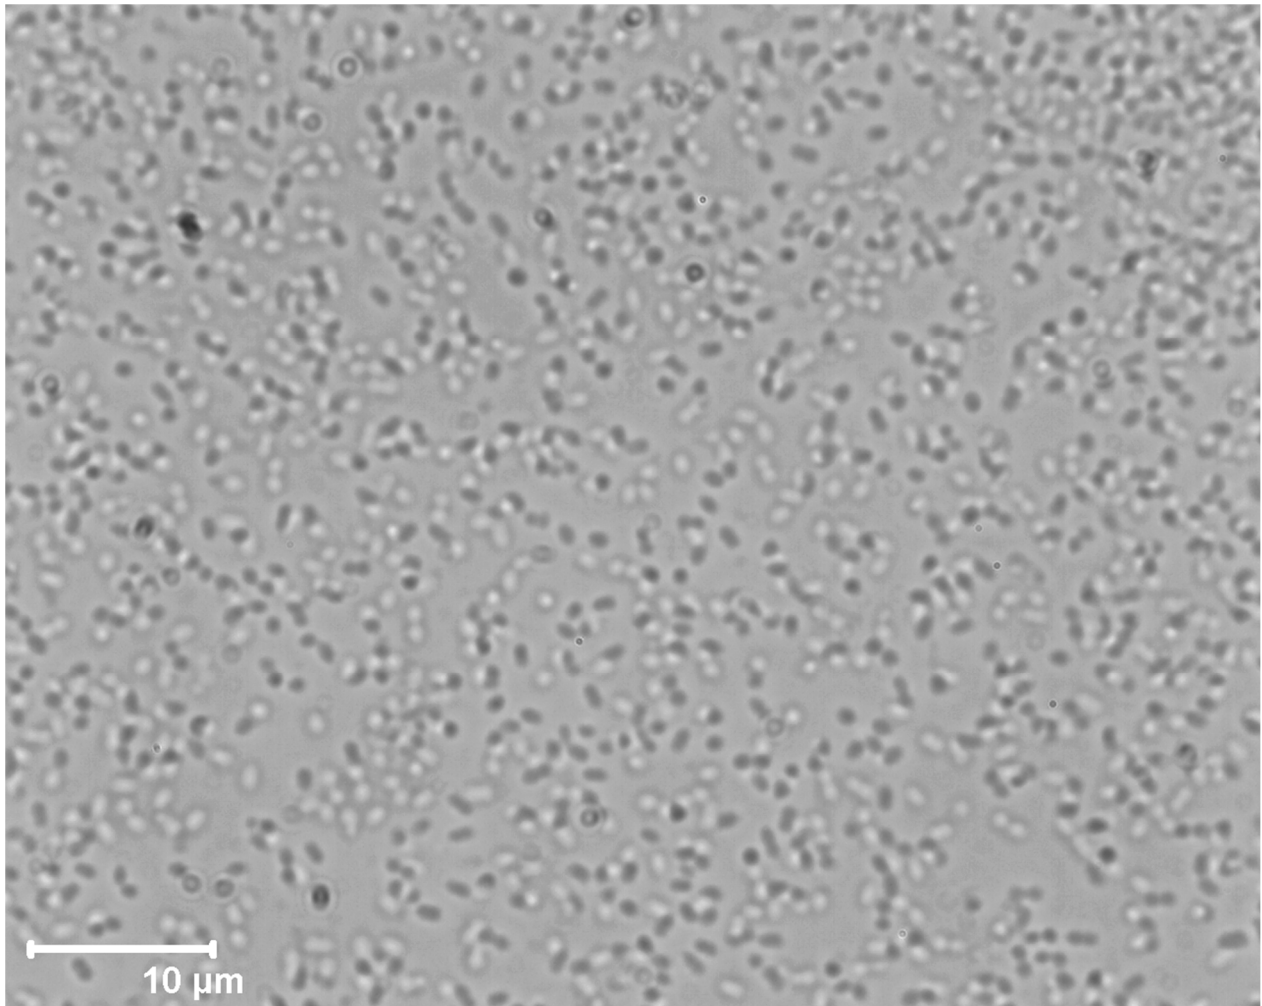

**Figure S8.** Effect of EGCG at 0.9 µg/mL on *P. fluorescens* bacterial morphology (magnification =100x).

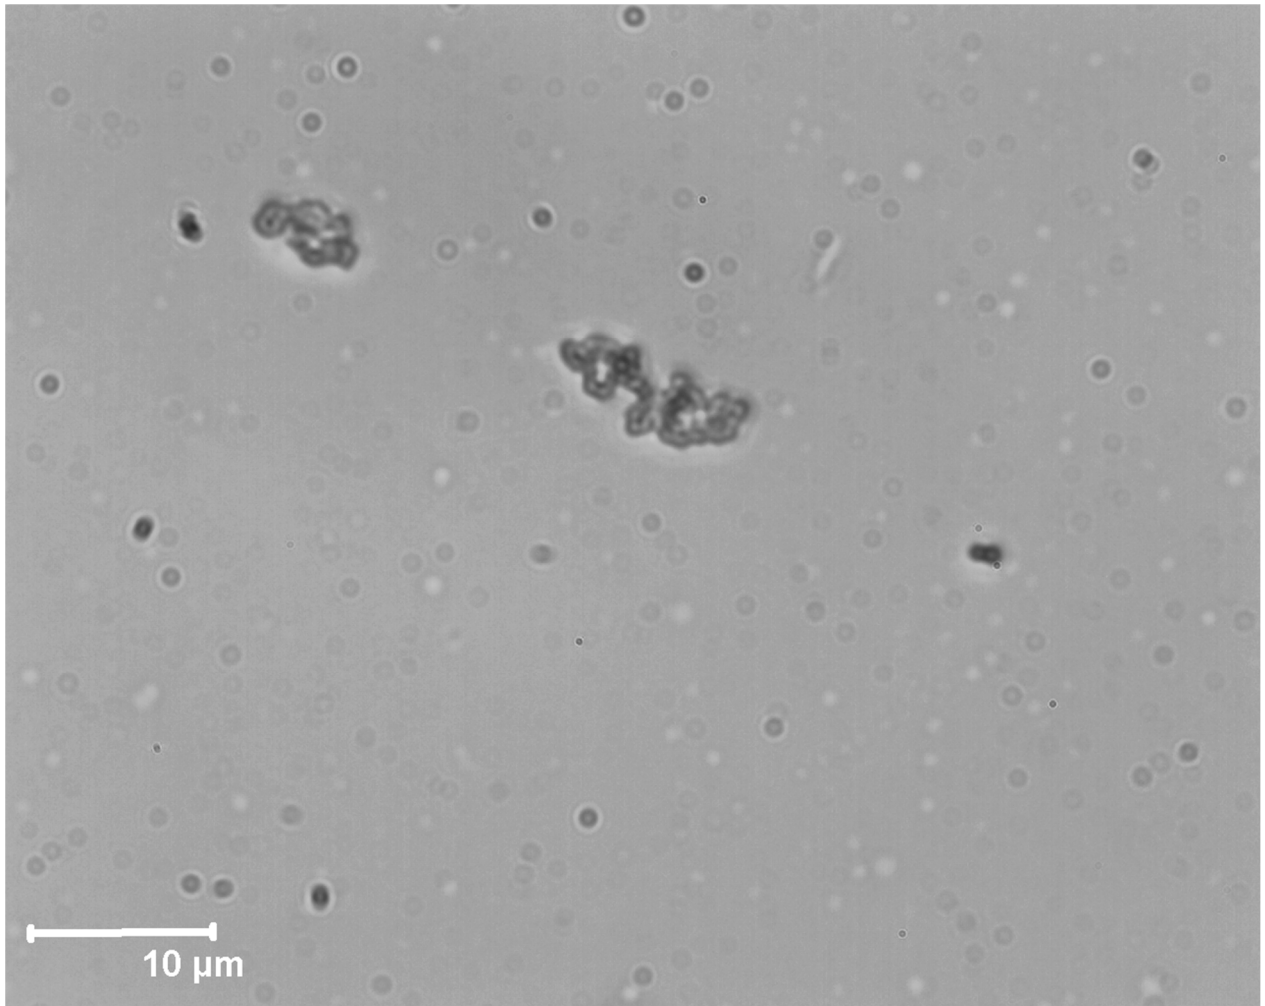

**Figure S9.** Effect of Chitosan-P at 0.9 μg/mL on *P. fluorescens* bacterial morphology (magnification =100x).

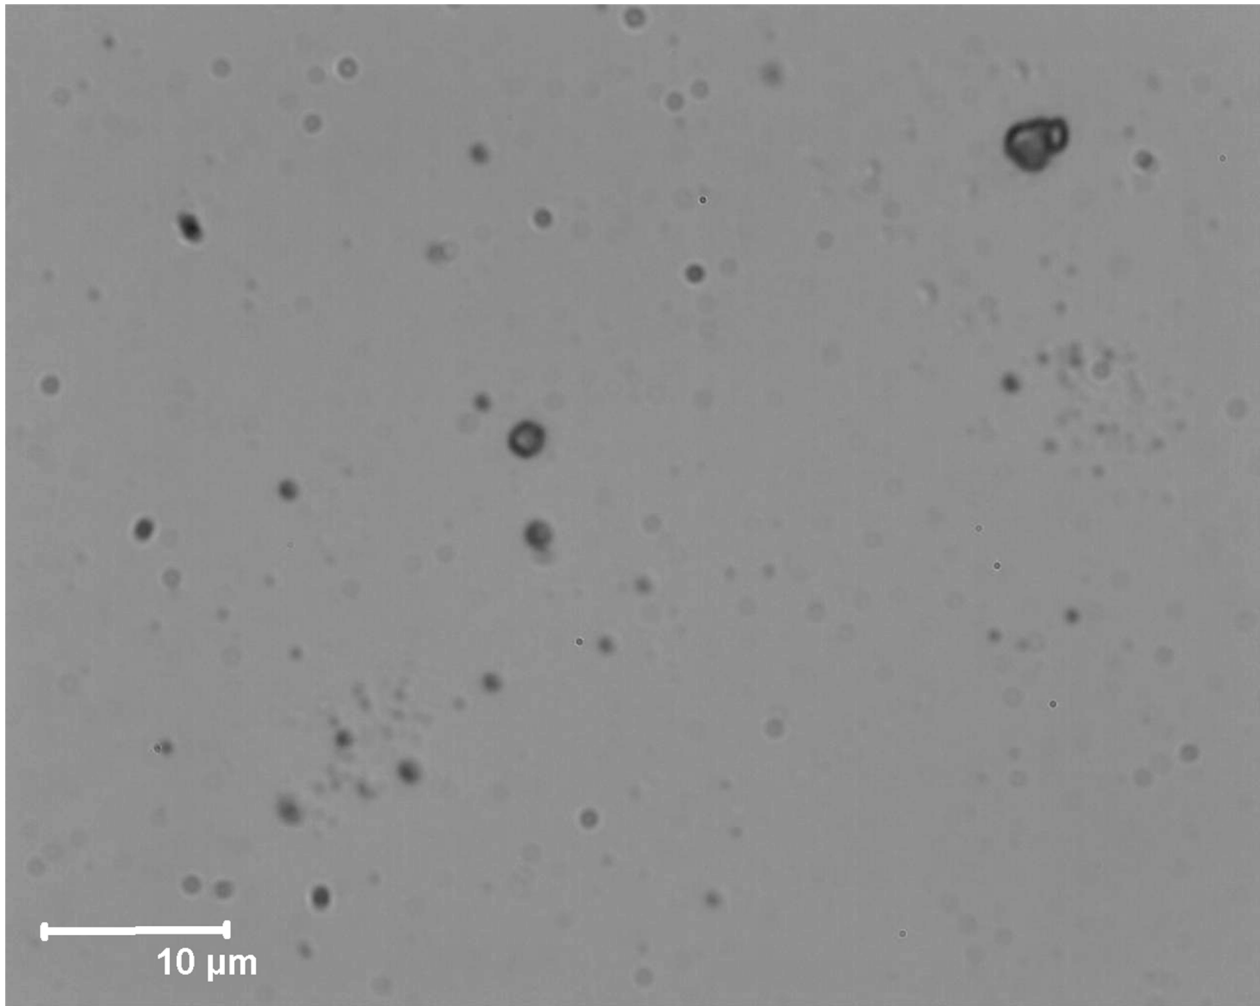

**Figure S10.** Effect of EGCG-g-chitosan-P at 0.9  $\mu\text{g/mL}$  on *P. fluorescens* bacterial morphology (magnification =100x).
